# Supplementary material
Source: PubMed Central journal article supplement (PMC4503331)
Supplement: NIHMS704385-supplement-Supplementary_Material.pdf [file NIHMS704385-supplement-Supplementary_Material.pdf]

Supplementary Materials for  
**Prediction of resistance development against drug combinations by  
collateral responses to component drugs**

Christian Munck, Heidi K. Gumpert, Annika I. Nilsson Wallin, Harris H. Wang,  
Morten O. A. Sommer\*

\*Corresponding author. E-mail: msom@bio.dtu.dk

Published 12 November 2014, *Sci. Transl. Med.* **6**, 262ra156 (2014)

DOI: 10.1126/scitranslmed.3009940

**The PDF file includes:**

- Fig. S1. Fold increase in drug tolerance during evolution experiment.
- Fig. S2. IC<sub>90</sub> dose-response curves.
- Fig. S3. Correlation between IC<sub>50</sub> or MIC, and IC<sub>90</sub>-based measurements.
- Fig. S4. Alternative correlation between FICI and evolution of resistance.
- Fig. S5. Competition between wild-type  $\Delta$ lacZ and mutant.
- Table S1. Raw OD<sub>600</sub> readings.
- Table S2. Sequencing coverage.
- Table S3. Individual SNPs and INDELS.
- Table S4. Oligos for MAGE and qPCR primers.
- Reference (76)

A

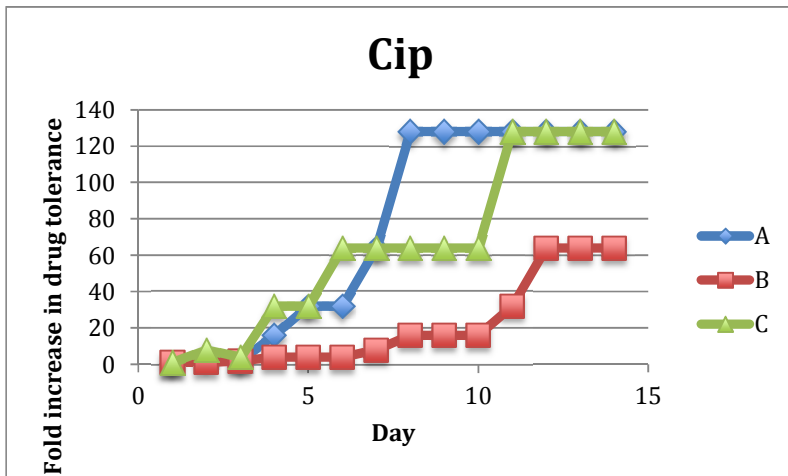

B

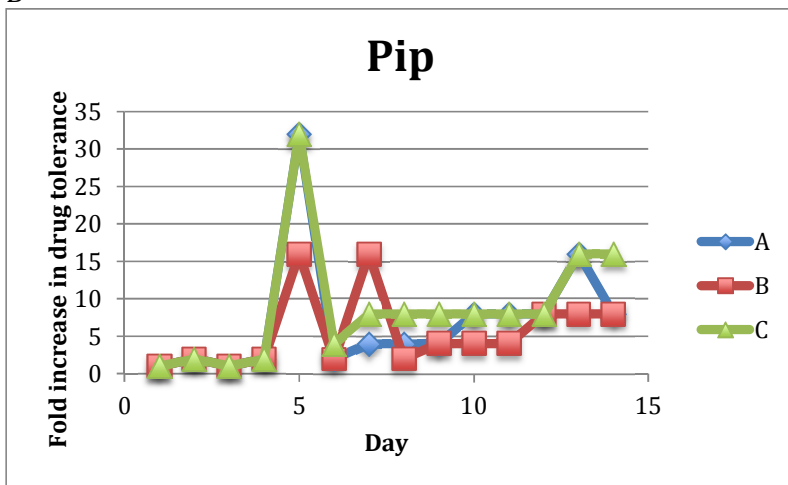

C

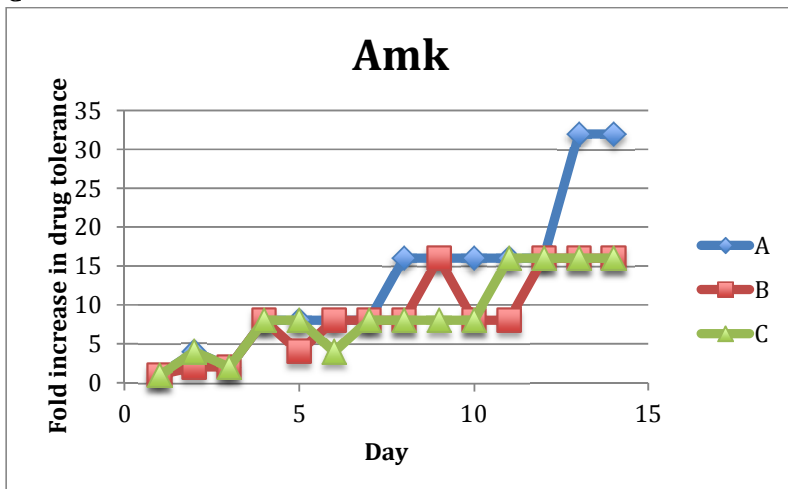

D

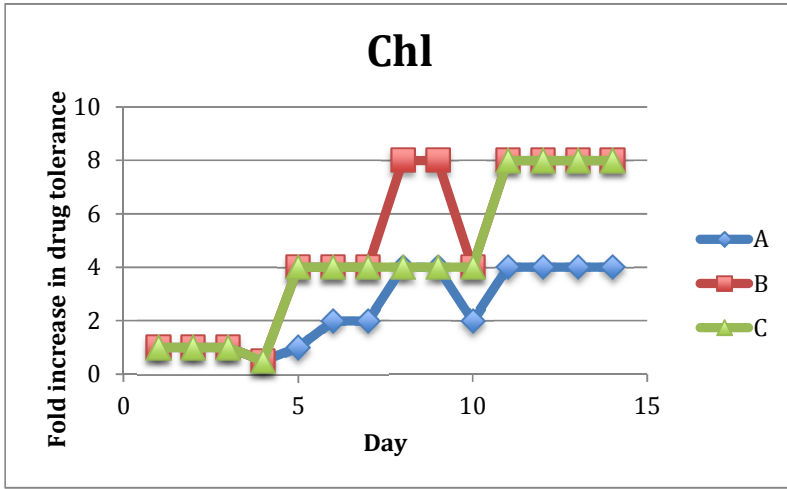

E

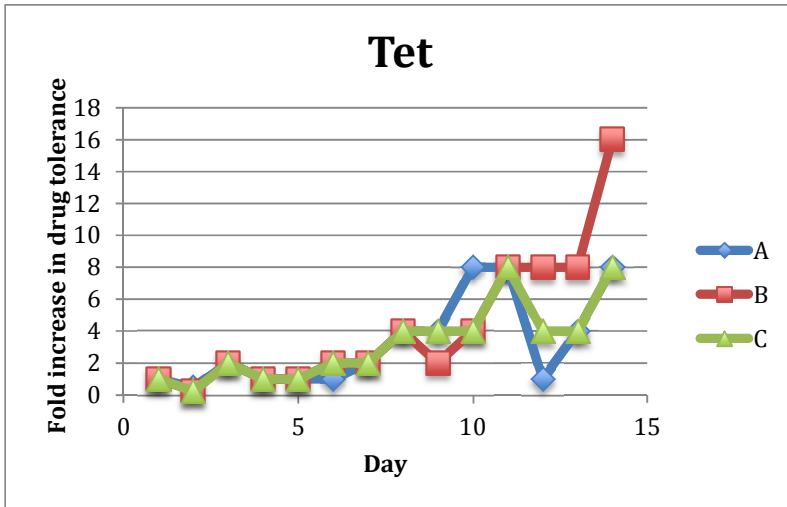

F

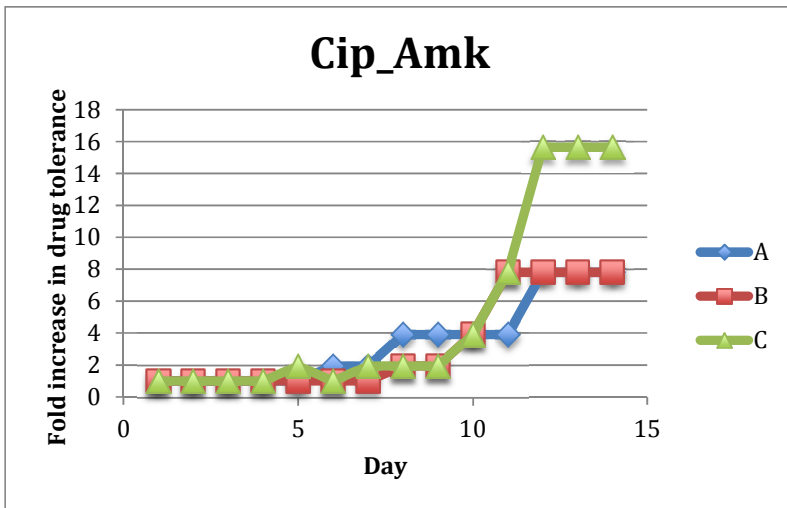

G

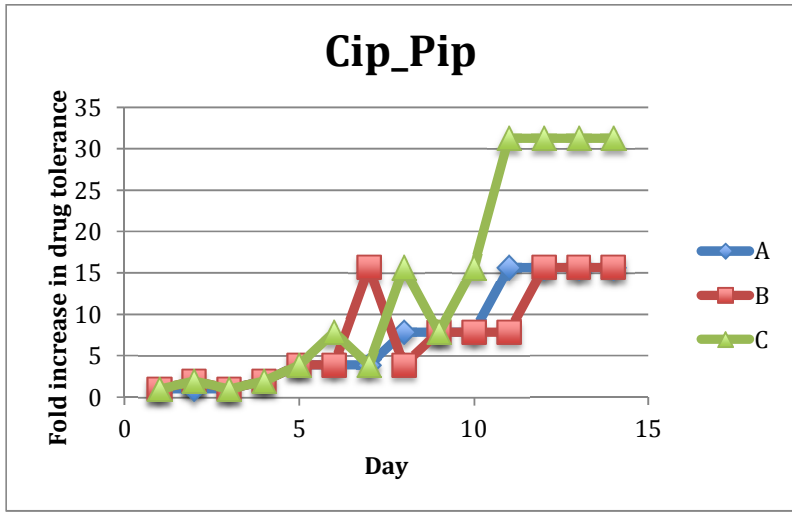

H

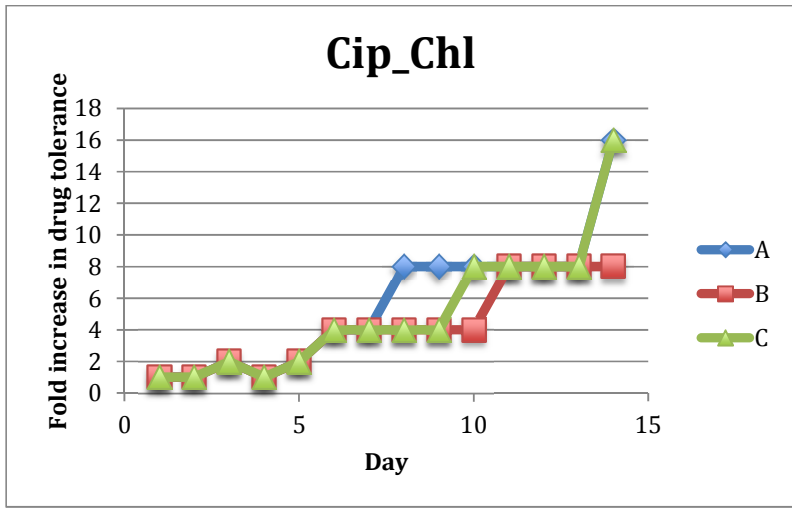

I

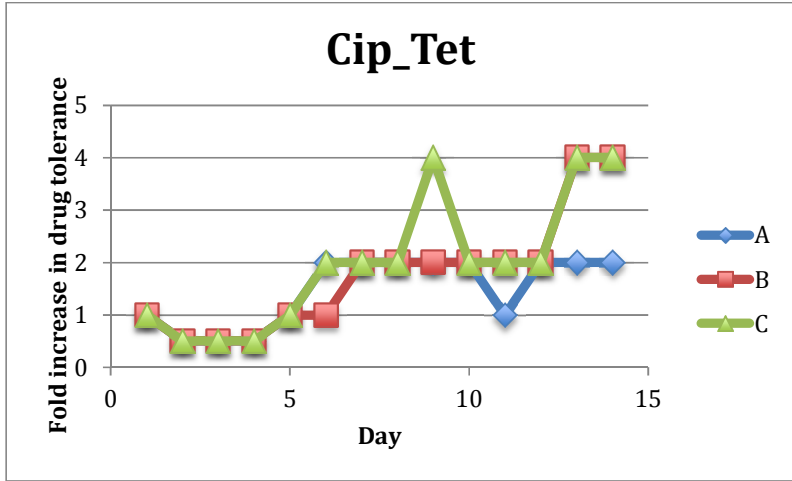

J

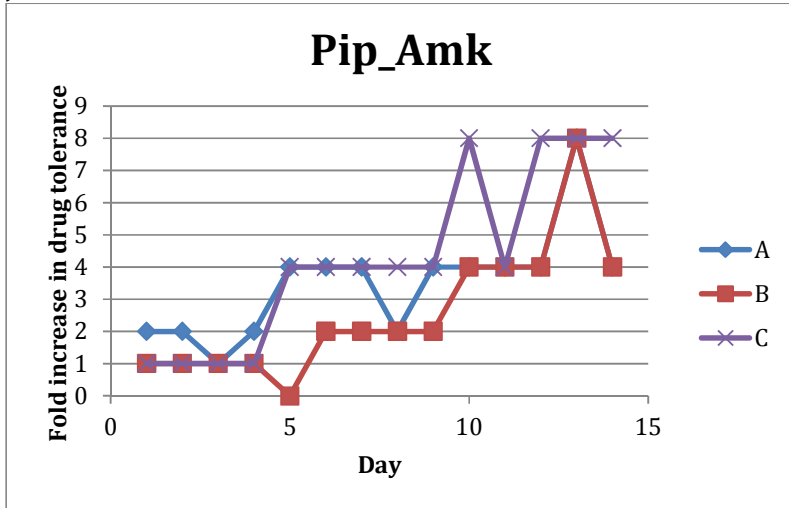

K

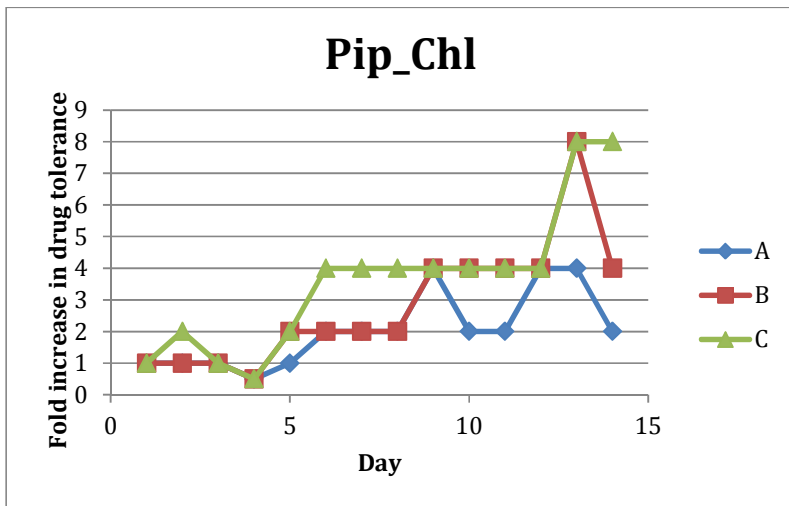

L

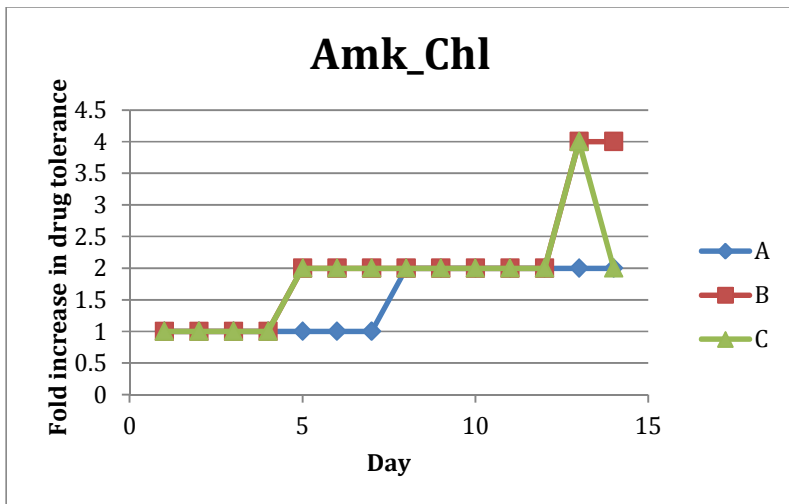

M

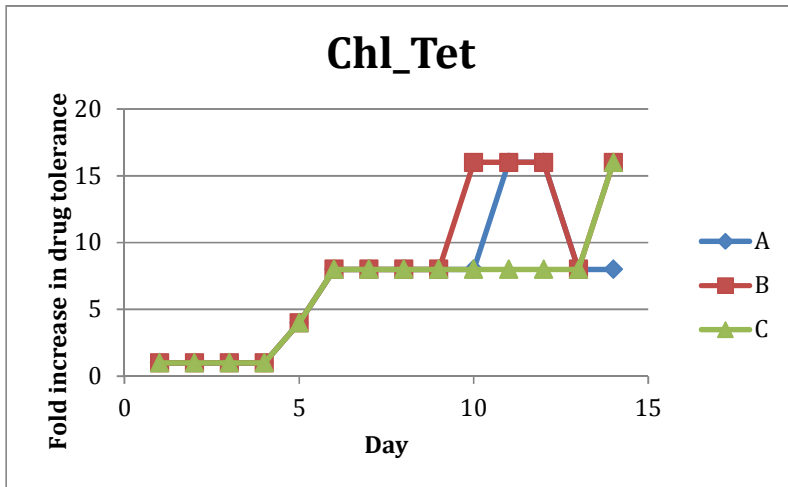

N

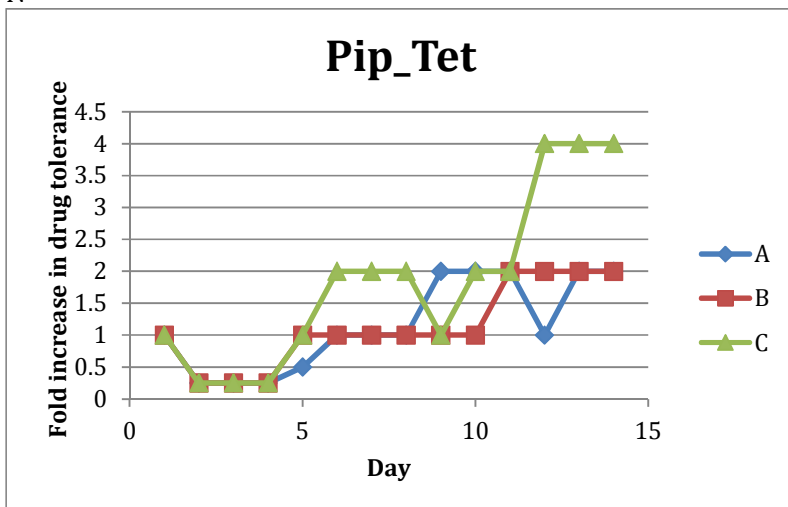

O

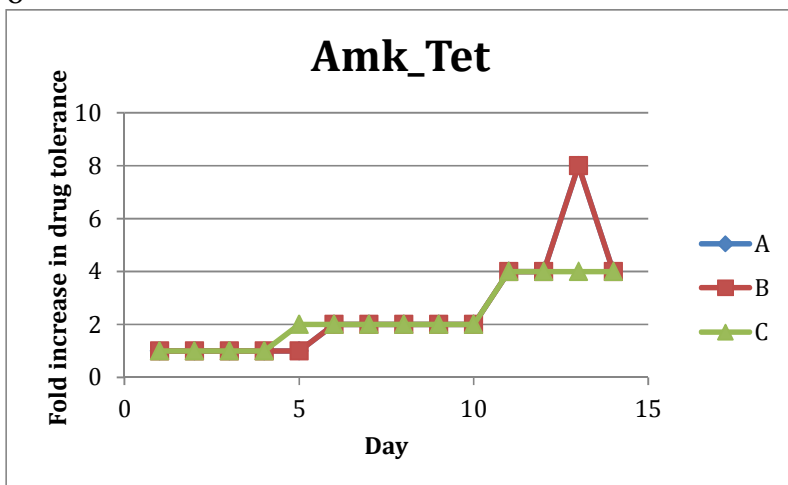

**Fig. S1.** Fold increase in drug tolerance during evolution experiment.

The figures shows the fold increase in the drug tolerance as the strains are passed into higher drug concentrations (A- O). Due to the large inoculum, some variability is observed.

**Fig. S2.** IC<sub>90</sub> dose-response curves.

Dose response curves of all lineages (Available from dropbox

<https://dl.dropboxusercontent.com/u/24306487/Munck-Supplement.zip>).

The title indicates the drug(s) that the strain is evolved to, and the x-axis legend denotes the antibiotic(s) tested against. Fitting is performed with the R package `drc()` using the default four-parameter logistic model (Materials and Methods). Error bars depict SD.

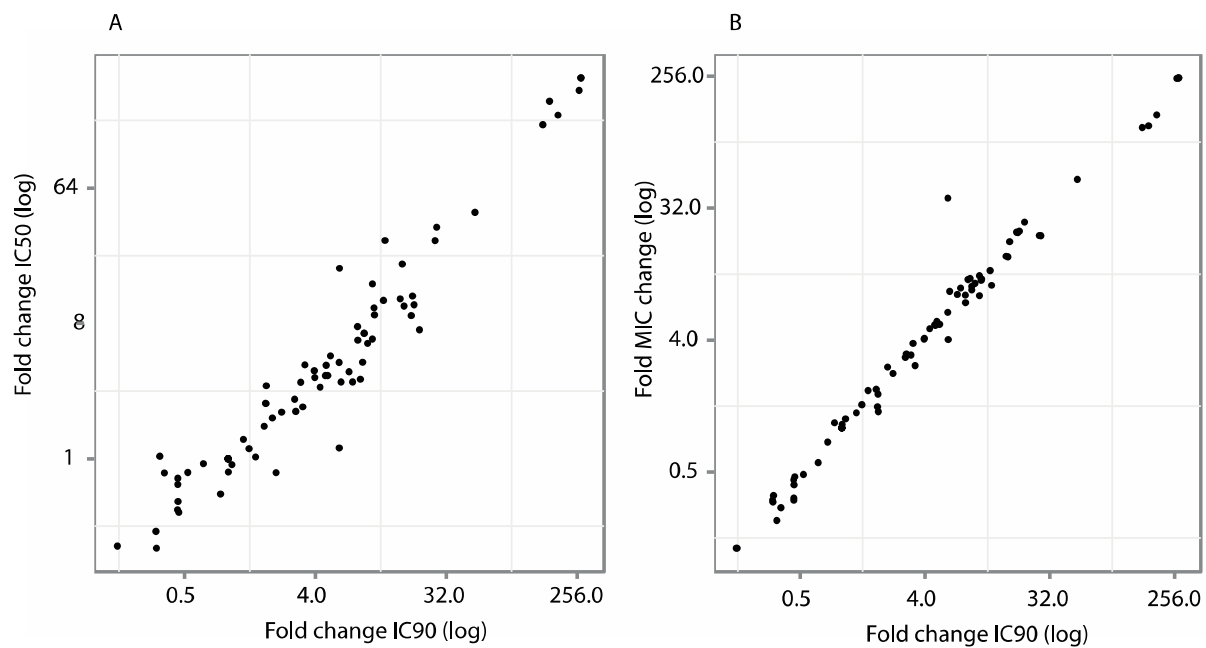

**Fig. S3.** Correlation between IC<sub>50</sub> or MIC, and IC<sub>90</sub>-based measurements.

Correlation between the fold change in inhibitory concentration (IC) of the single drug

evolved lineages, measured as IC<sub>50</sub> vs. IC<sub>90</sub> (A) and between the fold change of the MIC (defined as IC<sub>95</sub>) vs. IC<sub>90</sub> (B).

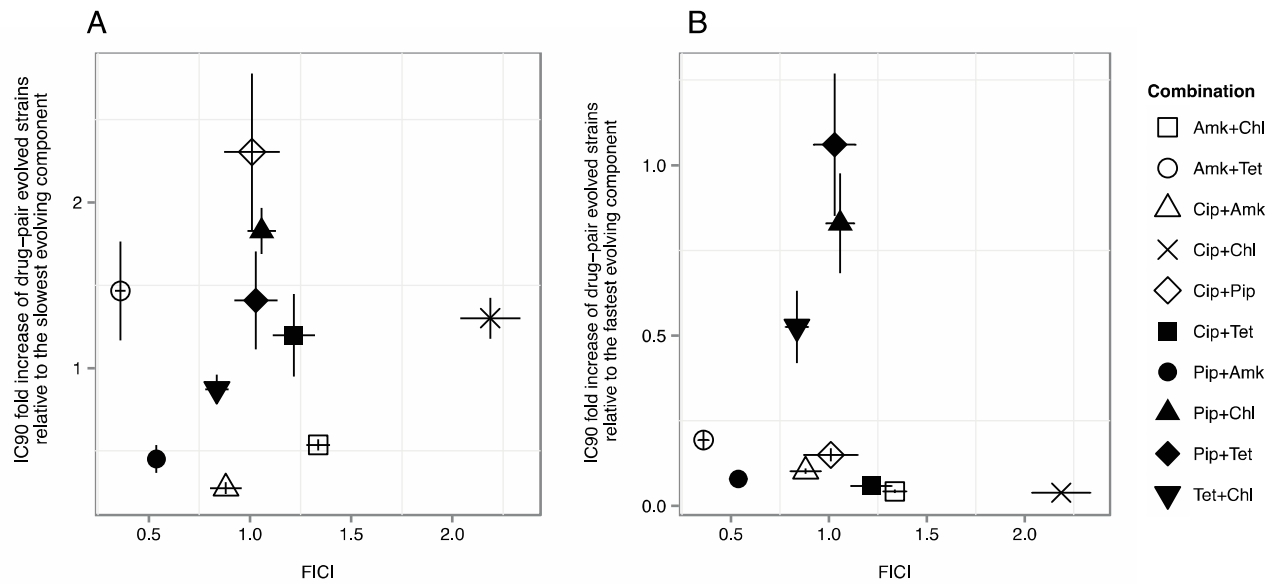

**Fig. S4.** Alternative correlation between FICI and evolution of resistance.

A) Correlation between FICI and the fold  $IC_{90}$  increase for of the drug-pair evolved lineages relative to the slowest evolving single-drug component:  $\Delta IC_{90}[AB]_{AB} / \min(\Delta IC_{90}[A]_A, \Delta IC_{90}[B]_B)$ .

B) Correlation between FICI and the fold  $IC_{90}$  increase for of the drug-pair evolved lineages relative to the fastest evolving single-drug component:  $\Delta IC_{90}[AB]_{AB} / \max(\Delta IC_{90}[A]_A, \Delta IC_{90}[B]_B)$ .

Error-bars depict SD of FICI and SEM of evolution measure across the three parallel-evolved lineages. No significant correlation was found ( $P > 0.05$ , Bonferroni corrected Spearman correlation).



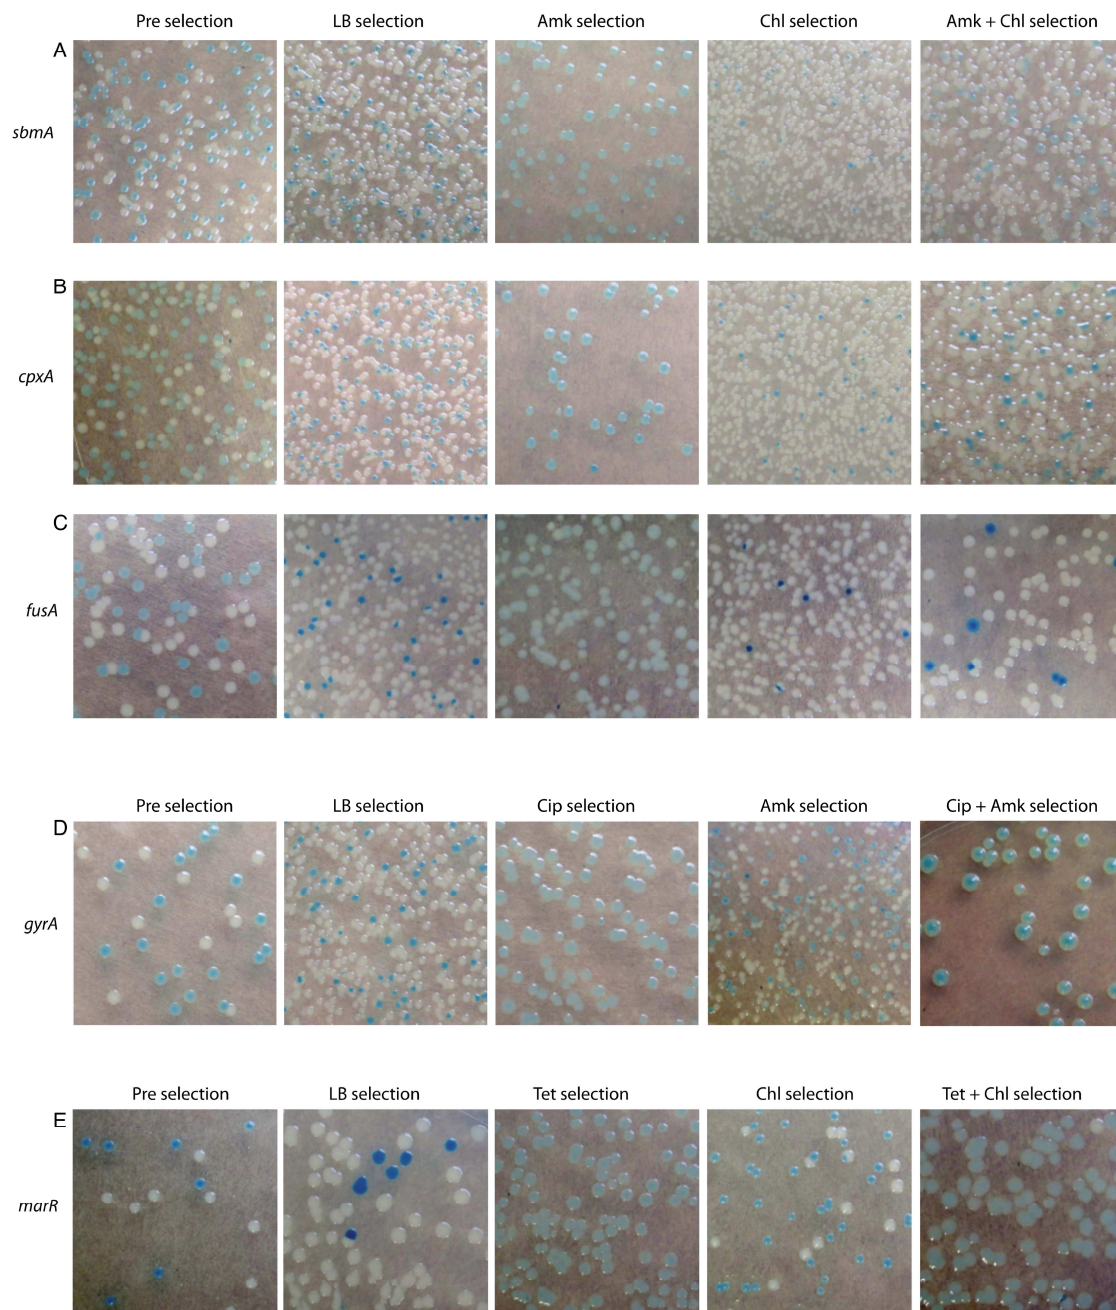

**Fig. S5.** Competition between wild-type  $\Delta$ lacZ and mutant.

WT and mutant alleles were mixed 1:1 and grown overnight in sub-inhibitory concentrations of AB and plated on LB+IPTG+Xgal. The presence of chloramphenicol selects against the three mutations that confers amikacin resistance (*sbmA*, *cpxA* and *fusA*). In contrast the *gyrA* mutation is always selected when ciprofloxacin is present and it is not counter selected by amikacin. *marR* confers resistance to both tetracycline and chloramphenicol and is hence selected by both drugs.

**Table S1.** Raw OD<sub>600</sub> readings.

Xcel file containing the OD<sub>600</sub> measurements used for the dose response curves (Available from dropbox <https://dl.dropboxusercontent.com/u/24306487/Munck-Supplment.zip>).

The drug and strain column denotes the drug tested against and the strain tested, respectively. The alternating colors for the first two columns define experiments performed with the same AB solutions on the same day. AB01-AB11 is the drug concentrations from high to low in  $\mu\text{M}$ . C1-C11 is the raw OD<sub>600</sub> reads. Control contains the positive (green) and negative (red) controls per plate.

| Sample name | # reads  | # reads aligned | % aligned   | % genome >= 3X coverage |
|-------------|----------|-----------------|-------------|-------------------------|
| Amk_A       | 7685868  | 5368728         | 69.85194125 | 99.880                  |
| Amk_B       | 7362134  | 5270482         | 71.58905285 | 99.879                  |
| Amk_C       | 6373603  | 4729217         | 74.20005608 | 99.826                  |
| Amk_ChI_A   | 7756344  | 5274450         | 68.00175443 | 99.894                  |
| Amk_ChI_B   | 8423816  | 5783829         | 68.66043845 | 99.890                  |
| Amk_ChI_C   | 6139952  | 4400827         | 71.67526717 | 99.843                  |
| Amk_Tet_A   | 6161495  | 4182408         | 67.8797597  | 99.788                  |
| Amk_Tet_B   | 6085215  | 3919626         | 64.41228453 | 99.588                  |
| Amk_Tet_C   | 4689621  | 3060365         | 65.25825861 | 99.553                  |
| ChI_A       | 9225854  | 6611896         | 71.66703483 | 99.908                  |
| ChI_B       | 8007126  | 5907936         | 73.78347737 | 99.882                  |
| ChI_C       | 7453420  | 5546359         | 74.41361147 | 99.894                  |
| ChI_Tet_A   | 10788928 | 7375354         | 68.36039688 | 99.904                  |
| ChI_Tet_B   | 5938086  | 4207339         | 70.85345345 | 99.832                  |
| ChI_Tet_C   | 11031762 | 7576840         | 68.68204735 | 99.920                  |
| Cip_Amk_A   | 8240061  | 5745627         | 69.72796682 | 99.886                  |
| Cip_Amk_B   | 9038514  | 6491753         | 71.82323333 | 99.901                  |
| Cip_Amk_C   | 7846062  | 5563908         | 70.91338304 | 99.860                  |
| Cip_A       | 7376758  | 5479379         | 74.27895832 | 99.886                  |
| Cip_B       | 12740551 | 8709252         | 68.35851919 | 99.671                  |
| Cip_C       | 9313738  | 6650894         | 71.40950282 | 99.921                  |
| Cip_ChI_A   | 11938429 | 8371154         | 70.11939343 | 99.563                  |
| Cip_ChI_B   | 9645647  | 6937157         | 71.9200796  | 99.886                  |
| Cip_ChI_C   | 3052136  | 2143958         | 70.24451073 | 98.044                  |
| Cip_Pip_A   | 5809372  | 4045512         | 69.63768201 | 99.806                  |
| Cip_Pip_B   | 7511248  | 5532805         | 73.66026258 | 99.869                  |
| Cip_Pip_C   | 7251959  | 5092565         | 70.22330104 | 99.874                  |
| Cip_Tet_A   | 5853771  | 4109034         | 70.19464889 | 99.613                  |
| Cip_Tet_B   | 7874764  | 5277459         | 67.01736077 | 99.873                  |
| Cip_Tet_C   | 6488866  | 4447375         | 68.53855512 | 99.457                  |
| Pip_Amk_A   | 5214046  | 3718643         | 71.31971985 | 99.811                  |
| Pip_Amk_B   | 5591230  | 4106716         | 73.44924104 | 99.642                  |
| Pip_Amk_C   | 7464970  | 5652272         | 75.71727683 | 99.808                  |
| Pip_A       | 8772610  | 6209919         | 70.78758773 | 99.895                  |
| Pip_B       | 8003544  | 5843302         | 73.00893204 | 99.890                  |
| Pip_C       | 9623410  | 7193111         | 74.74596842 | 99.933                  |
| Pip_ChI_A   | 8544433  | 5796615         | 67.84083859 | 99.919                  |
| Pip_ChI_B   | 6621964  | 4842826         | 73.13277451 | 99.710                  |
| Pip_ChI_C   | 9850064  | 6651940         | 67.531947   | 99.861                  |
| Pip_Tet_A   | 9984949  | 7114928         | 71.2565282  | 99.931                  |
| Pip_Tet_B   | 7268505  | 4962485         | 68.27380596 | 99.750                  |
| Pip_Tet_C   | 10015645 | 6906844         | 68.96055122 | 99.921                  |
| Tet_A       | 8432649  | 5792993         | 68.69719112 | 99.917                  |
| Tet_B       | 8864063  | 6440958         | 72.66372091 | 99.897                  |
| Tet_C       | 13861024 | 9727194         | 70.17659013 | 99.953                  |
| WT_MG1655   | 13973666 | 9645699         | 69.02769109 | 99.941                  |

**Table S2.** Sequencing coverage.

The number of SOLiD reads generated, the number and percentage of reads that aligned to the *E. coli* MG1655 genome, and the percentage of the genome that had at least 3 times or greater coverage per sample is reported.

A. SNPs Identified in the starting *E. coli* MG1655 Strain

| Position | Mutation | Genbank ID  | Gene | Product                          | Conservative |
|----------|----------|-------------|------|----------------------------------|--------------|
| 547694   | A->G     |             | ylbE |                                  | Yes          |
| 802885   | C->A     | NP_415292.2 | ybhJ | predicted hydratase              | No           |
| 1903785  | G->A     | NP_416335.4 | yebN | conserved inner membrane protein | No           |
| 3957957  | C->T     |             |      |                                  |              |

B. INDELS Identified in the starting *E. coli* MG1655 Strain

| From Position | Type      | INDEL | Genbank ID | Gene | Product |
|---------------|-----------|-------|------------|------|---------|
| 547832        | insertion | G->GG |            |      |         |

C. SNPs Identified in the evolved MG1655 Strain

| Strain/AB_selection | Position | Mutation | Genbank ID  | Gene | Product                                                               | Conservative |
|---------------------|----------|----------|-------------|------|-----------------------------------------------------------------------|--------------|
| Amk_A               | 396442   | G->A     | NP_414911.1 | sbmA | microcin B17 transporter                                              | No           |
| Amk_A               | 1363139  | G->C     | NP_415817.1 | puuB | gamma-Glu-putrescine oxidase;<br>FAD/NAD(P)-binding                   | No           |
| Amk_A               | 1976527  | G->T     |             |      |                                                                       |              |
| Amk_A               | 1976528  | G->A     |             |      |                                                                       |              |
| Amk_A               | 3469498  | T->C     | NP_417799.1 | fusA | protein chain elongation factor EF-G; GTP-binding                     | No           |
| Amk_A               | 3469708  | G->T     | NP_417799.1 | fusA | protein chain elongation factor EF-G; GTP-binding                     | No           |
| Amk_A               | 3875481  | A->C     | NP_418153.4 | yidB | conserved protein; DUF937 family                                      | No           |
| Amk_A               | 4102908  | C->A     | NP_418347.1 | cpxA | sensory histidine kinase in two-component regulatory system with CpxR | No           |
| Amk_B               | 396368   | C->A     | NP_414911.1 | sbmA | microcin B17 transporter                                              | No           |
| Amk_B               | 2021141  | G->A     | NP_416460.1 | fliR | flagellar export pore protein                                         | Yes          |
| Amk_B               | 3469714  | G->A     | NP_417799.1 | fusA | protein chain elongation factor EF-G; GTP-binding                     | No           |
| Amk_B               | 4102763  | G->A     | NP_418347.1 | cpxA | sensory histidine kinase in two-component regulatory system with CpxR | No           |
| Amk_C               | 396611   | G->A     | NP_414911.1 | sbmA | microcin B17 transporter                                              | No           |
| Amk_C               | 1976527  | G->T     |             |      |                                                                       |              |
| Amk_C               | 1976528  | G->A     |             |      |                                                                       |              |
| Amk_C               | 1990891  | A->T     |             |      |                                                                       |              |
| Amk_C               | 2690454  | C->T     | YP_026170.1 | purL | phosphoribosylformyl-glycineamide synthetase                          | No           |
| Amk_C               | 3469709  | G->T     | NP_417799.1 | fusA | protein chain elongation factor EF-G; GTP-binding                     | No           |
| Amk_C               | 4025094  | T->A     | NP_418286.1 | fre  | NAD(P)H-flavin reductase                                              | No           |

|          |         |      |             |      |                                                                         |     |
|----------|---------|------|-------------|------|-------------------------------------------------------------------------|-----|
| Amk_C    | 4102449 | A->T | NP_418347.1 | cpxA | sensory histidine kinase in two-component regulatory system with CpxR   | No  |
| AmkChl_A | 4184421 | C->G | NP_418415.1 | rpoC | RNA polymerase; beta prime subunit                                      | No  |
| AmkChl_B | 1617423 | C->T | NP_416047.4 | marR | DNA-binding transcriptional repressor of multiple antibiotic resistance | No  |
| AmkChl_B | 1976527 | G->T |             |      |                                                                         |     |
| AmkTet_A | 810513  | G->T | NP_415297.1 | bioF | 8-amino-7-oxononanoate synthase                                         | No  |
| AmkTet_A | 4101770 | C->T | NP_418347.1 | cpxA | sensory histidine kinase in two-component regulatory system with CpxR   | No  |
| AmkTet_B | 3469759 | A->C | NP_417799.1 | fusA | protein chain elongation factor EF-G; GTP-binding                       | No  |
| AmkTet_C | 1285929 | G->A |             |      |                                                                         |     |
| AmkTet_C | 3451124 | C->G | NP_417780.1 | rpsJ | 30S ribosomal subunit protein S10                                       | No  |
| AmkTet_C | 3470824 | A->T | NP_417799.1 | fusA | protein chain elongation factor EF-G; GTP-binding                       | No  |
| AmkTet_C | 4092723 | G->A |             |      |                                                                         |     |
| AmkTet_C | 4092726 | C->T |             |      |                                                                         |     |
| AmkTet_C | 4092728 | C->T |             |      |                                                                         |     |
| AmkTet_C | 4102680 | T->A | NP_418347.1 | cpxA | sensory histidine kinase in two-component regulatory system with CpxR   | No  |
| AmlChl_C | 1150959 | T->C | NP_415612.1 | acpP | acyl carrier protein (ACP)                                              | No  |
| AmlChl_C | 1977294 | C->A |             |      |                                                                         |     |
| AmlChl_C | 1998241 | G->T | NP_416430.1 | fliY | cystine transporter subunit                                             | No  |
| AmlChl_C | 4102440 | C->T | NP_418347.1 | cpxA | sensory histidine kinase in two-component regulatory system with CpxR   | No  |
| Chl_A    | 1976527 | G->T |             |      |                                                                         |     |
| Chl_A    | 1976528 | G->A |             |      |                                                                         |     |
| Chl_A    | 2089530 | C->T | NP_416524.1 | hisD | bifunctional histidinal dehydrogenase/histidinol dehydrogenase          | No  |
| Chl_A    | 4632601 | C->T | NP_418813.1 | rob  | right oriC-binding transcriptional activator; AraC family               | No  |
| Chl_B    | 1500383 | G->T |             |      |                                                                         |     |
| Chl_B    | 1617399 | A->T | NP_416047.4 | marR | DNA-binding transcriptional repressor of multiple antibiotic resistance | No  |
| Chl_C    | 848200  | G->A |             |      |                                                                         |     |
| Chl_C    | 882884  | C->A |             |      |                                                                         |     |
| Chl_C    | 1977294 | C->A |             |      |                                                                         |     |
| Chl_C    | 3370896 | G->A | NP_417692.1 | nanA | N-acetylneuraminate lyase                                               | Yes |
| Chl_C    | 4632867 | C->T | NP_418813.1 | rob  | right oriC-binding transcriptional activator; AraC family               | No  |
| ChlTet_A | 1977294 | C->A |             |      |                                                                         |     |
| ChlTet_B | 1617492 | C->T | NP_416047.4 | marR | DNA-binding transcriptional repressor of multiple antibiotic resistance | No  |
| ChlTet_B | 1977291 | C->T |             |      |                                                                         |     |
| ChlTet_B | 1977294 | C->A |             |      |                                                                         |     |
| ChlTet_B | 3212876 | G->A | NP_417539.1 | rpoD | RNA polymerase; sigma 70 (sigma D) factor                               | No  |
| ChlTet_B | 4184369 | G->T | NP_418415.1 | rpoC | RNA polymerase; beta prime subunit                                      | No  |
| ChlTet_C | 1617492 | C->T | NP_416047.4 | marR | DNA-binding transcriptional repressor of multiple antibiotic resistance | No  |

|          |         |      |             |      |                                                                                                                         |     |
|----------|---------|------|-------------|------|-------------------------------------------------------------------------------------------------------------------------|-----|
| ChlTet_C | 3350464 | A->C | YP_026207.1 | arcB | aerobic respiration control sensor histidine protein kinase; cognate to two-component response regulators ArcA and RssB | No  |
| Cip_A    | 1976527 | G->T |             |      |                                                                                                                         |     |
| Cip_A    | 2337184 | C->A | NP_416734.1 | gyrA | DNA gyrase (type II topoisomerase); subunit A                                                                           | No  |
| Cip_A    | 2337220 | C->T | NP_416734.1 | gyrA | DNA gyrase (type II topoisomerase); subunit A                                                                           | No  |
| Cip_A    | 4187448 | C->G | NP_418415.1 | rpoC | RNA polymerase; beta prime subunit                                                                                      | No  |
| Cip_A    | 4187449 | A->T | NP_418415.1 | rpoC | RNA polymerase; beta prime subunit                                                                                      | Yes |
| Cip_A    | 4187450 | G->C | NP_418415.1 | rpoC | RNA polymerase; beta prime subunit                                                                                      | No  |
| Cip_B    | 1195443 | C->T | NP_415654.1 | icd  | e14 prophage                                                                                                            | Yes |
| Cip_B    | 1195455 | C->T | NP_415654.1 | icd  | e14 prophage                                                                                                            | Yes |
| Cip_B    | 1195468 | T->C | NP_415654.1 | icd  | e14 prophage                                                                                                            | Yes |
| Cip_B    | 1195470 | A->G | NP_415654.1 | icd  | e14 prophage                                                                                                            | Yes |
| Cip_B    | 1210633 | C->A |             |      |                                                                                                                         |     |
| Cip_B    | 1210635 | A->G |             |      |                                                                                                                         |     |
| Cip_B    | 1976527 | G->T |             |      |                                                                                                                         |     |
| Cip_B    | 1976528 | G->A |             |      |                                                                                                                         |     |
| Cip_B    | 2337183 | T->C | NP_416734.1 | gyrA | DNA gyrase (type II topoisomerase); subunit A                                                                           | No  |
| Cip_B    | 3876753 | A->C | YP_026241.1 | gyrB | DNA gyrase; subunit B                                                                                                   | No  |
| Cip_B    | 4632867 | C->T | NP_418813.1 | rob  | right oriC-binding transcriptional activator; AraC family                                                               | No  |
| Cip_C    | 485058  | C->A | NP_414997.1 | acrR | DNA-binding transcriptional repressor                                                                                   | No  |
| Cip_C    | 2337183 | T->C | NP_416734.1 | gyrA | DNA gyrase (type II topoisomerase); subunit A                                                                           | No  |
| Cip_C    | 2337202 | C->A | NP_416734.1 | gyrA | DNA gyrase (type II topoisomerase); subunit A                                                                           | No  |
| Cip_C    | 3256446 | A->C | YP_026204.1 | tdcG | L-serine dehydratase 3                                                                                                  | No  |
| CipAmk_A | 442247  | T->C |             |      |                                                                                                                         |     |
| CipAmk_A | 1990685 | C->T | NP_416422.1 | pgsA | phosphatidylglycerophosphate synthetase                                                                                 | No  |
| CipAmk_A | 4092726 | C->T |             |      |                                                                                                                         |     |
| CipAmk_A | 4092728 | C->T |             |      |                                                                                                                         |     |
| CipAmk_A | 4102470 | G->A | NP_418347.1 | cpxA | sensory histidine kinase in two-component regulatory system with CpxR                                                   | No  |
| CipAmk_B | 485144  | G->T | NP_414997.1 | acrR | DNA-binding transcriptional repressor                                                                                   | No  |
| CipAmk_B | 1976527 | G->T |             |      |                                                                                                                         |     |
| CipAmk_B | 1976528 | G->A |             |      |                                                                                                                         |     |
| CipAmk_B | 3469714 | G->T | NP_417799.1 | fusA | protein chain elongation factor EF-G; GTP-binding                                                                       | No  |
| CipAmk_C | 1977294 | C->A |             |      |                                                                                                                         |     |
| CipAmk_C | 2069371 | T->A |             | isrC |                                                                                                                         | No  |
| CipAmk_C | 2337183 | T->C | NP_416734.1 | gyrA | DNA gyrase (type II topoisomerase); subunit A                                                                           | No  |
| CipAmk_C | 2398061 | C->T | NP_416786.4 | nuoG | NADH:ubiquinone oxidoreductase; chain G                                                                                 | No  |
| CipAmk_C | 3469714 | G->T | NP_417799.1 | fusA | protein chain elongation factor EF-G; GTP-binding                                                                       | No  |
| CipAmk_C | 4031406 | T->A | YP_026273.1 | trkH | potassium transporter                                                                                                   | No  |

|          |         |      |             |      |                                                                                          |     |
|----------|---------|------|-------------|------|------------------------------------------------------------------------------------------|-----|
| CipAmk_C | 4275937 | T->A | NP_418487.1 | soxR | DNA-binding transcriptional dual regulator; Fe-S center for redox-sensing                | No  |
| CipChl_A | 1195443 | C->T | NP_415654.1 | icd  | e14 prophage                                                                             | Yes |
| CipChl_A | 1195455 | C->T | NP_415654.1 | icd  | e14 prophage                                                                             | Yes |
| CipChl_A | 1210633 | C->A |             |      |                                                                                          |     |
| CipChl_A | 1210635 | A->G |             |      |                                                                                          |     |
| CipChl_A | 1617394 | T->A | NP_416047.4 | marR | DNA-binding transcriptional repressor of multiple antibiotic resistance                  | No  |
| CipChl_A | 1718801 | C->T | NP_416159.2 | slyA | DNA-binding transcriptional activator                                                    | No  |
| CipChl_A | 1976528 | G->A |             |      |                                                                                          |     |
| CipChl_A | 2040948 | A->G |             |      |                                                                                          |     |
| CipChl_B | 4187354 | A->C | NP_418415.1 | rpoC | RNA polymerase; beta prime subunit                                                       | No  |
| CipChl_B | 4275549 | C->T | NP_418487.1 | soxR | DNA-binding transcriptional dual regulator; Fe-S center for redox-sensing                | No  |
| CipChl_C | 111493  | G->T |             |      |                                                                                          |     |
| CipChl_C | 882884  | C->A |             |      |                                                                                          |     |
| CipPip_A | 156256  | T->G |             |      |                                                                                          |     |
| CipPip_A | 2337183 | T->C | NP_416734.1 | gyrA | DNA gyrase (type II topoisomerase); subunit A                                            | No  |
| CipPip_A | 4183254 | G->T | NP_418414.1 | rpoB | RNA polymerase; beta subunit                                                             | No  |
| CipPip_A | 4632867 | C->T | NP_418813.1 | rob  | right oriC-binding transcriptional activator; AraC family                                | No  |
| CipPip_B | 1622859 | A->C | NP_416055.1 | ydeJ | conserved protein                                                                        | Yes |
| CipPip_B | 1976527 | G->T |             |      |                                                                                          |     |
| CipPip_B | 1976528 | G->A |             |      |                                                                                          |     |
| CipPip_B | 3534356 | G->A | NP_417864.1 | ompR | DNA-binding response regulator in two-component regulatory system with EnvZ              | No  |
| CipPip_B | 4187442 | T->G | NP_418415.1 | rpoC | RNA polymerase; beta prime subunit                                                       | No  |
| CipPip_B | 4275914 | A->G | NP_418487.1 | soxR | DNA-binding transcriptional dual regulator; Fe-S center for redox-sensing                | Yes |
| CipPip_C | 92851   | G->T | NP_414626.1 | ftsI | transpeptidase involved in septal peptidoglycan synthesis (penicillin-binding protein 3) | No  |
| CipPip_C | 92852   | C->T | NP_414626.1 | ftsI | transpeptidase involved in septal peptidoglycan synthesis (penicillin-binding protein 3) | Yes |
| CipPip_C | 2337202 | C->A | NP_416734.1 | gyrA | DNA gyrase (type II topoisomerase); subunit A                                            | No  |
| CipPip_C | 3534290 | G->T | NP_417864.1 | ompR | DNA-binding response regulator in two-component regulatory system with EnvZ              | No  |
| CipTet_B | 1976527 | G->T |             |      |                                                                                          |     |
| CipTet_B | 1976528 | G->A |             |      |                                                                                          |     |
| CipTet_B | 3048873 | T->C |             |      |                                                                                          |     |
| CipTet_B | 3533133 | C->T | NP_417863.1 | envZ | sensory histidine kinase in two-component regulatory system with OmpR                    | No  |
| CipTet_C | 1363138 | C->G | NP_415817.1 | puuB | gamma-Glu-putrescine oxidase; FAD/NAD(P)-binding                                         | No  |
| CipTet_C | 1363139 | G->A | NP_415817.1 | puuB | gamma-Glu-putrescine oxidase; FAD/NAD(P)-binding                                         | No  |
| CipTet_C | 1617483 | T->G | NP_416047.4 | marR | DNA-binding transcriptional repressor of multiple antibiotic resistance                  | No  |

|          |         |      |             |      |                                                                                          |    |
|----------|---------|------|-------------|------|------------------------------------------------------------------------------------------|----|
| CipTet_C | 2337201 | C->T | NP_416734.1 | gyrA | DNA gyrase (type II topoisomerase); subunit A                                            | No |
| Pip_A    | 92851   | G->T | NP_414626.1 | ftsI | transpeptidase involved in septal peptidoglycan synthesis (penicillin-binding protein 3) | No |
| Pip_A    | 485070  | T->G | NP_414997.1 | acrR | DNA-binding transcriptional repressor                                                    | No |
| Pip_A    | 1363140 | C->G | NP_415817.1 | puuB | gamma-Glu-putrescine oxidase; FAD/NAD(P)-binding                                         | No |
| Pip_A    | 1617132 | A->C |             |      |                                                                                          |    |
| Pip_A    | 1617133 | G->C |             |      |                                                                                          |    |
| Pip_A    | 1617134 | G->T |             |      |                                                                                          |    |
| Pip_B    | 1617133 | G->C |             |      |                                                                                          |    |
| Pip_B    | 1617134 | G->T |             |      |                                                                                          |    |
| Pip_B    | 4183082 | A->G | NP_418414.1 | rpoB | RNA polymerase; beta subunit                                                             | No |
| Pip_C    | 92326   | C->T | NP_414626.1 | ftsI | transpeptidase involved in septal peptidoglycan synthesis (penicillin-binding protein 3) | No |
| Pip_C    | 99209   | G->T | NP_414631.1 | ftsW | Lipid II flippase                                                                        | No |
| Pip_C    | 1976527 | G->T |             |      |                                                                                          |    |
| Pip_C    | 1977294 | C->A |             |      |                                                                                          |    |
| Pip_C    | 3533169 | A->C | NP_417863.1 | envZ | sensory histidine kinase in two-component regulatory system with OmpR                    | No |
| PipAmk_A | 485598  | G->A | NP_414997.1 | acrR | DNA-binding transcriptional repressor                                                    | No |
| PipAmk_A | 4102886 | A->G | NP_418347.1 | cpxA | sensory histidine kinase in two-component regulatory system with CpxR                    | No |
| PipAmk_B | 3470123 | G->A | NP_417799.1 | fusA | protein chain elongation factor EF-G; GTP-binding                                        | No |
| PipAmk_C | 2623803 | G->C | NP_416997.1 | ppx  | exopolyphosphatase                                                                       | No |
| PipAmk_C | 3471188 | C->A | NP_417799.1 | fusA | protein chain elongation factor EF-G; GTP-binding                                        | No |
| PipAmk_C | 4102452 | C->T | NP_418347.1 | cpxA | sensory histidine kinase in two-component regulatory system with CpxR                    | No |
| PipAmk_C | 4632747 | A->C | NP_418813.1 | rob  | right oriC-binding transcriptional activator; AraC family                                | No |
| PipChl_A | 485024  | C->T | NP_414997.1 | acrR | DNA-binding transcriptional repressor                                                    | No |
| PipChl_A | 1976527 | G->T |             |      |                                                                                          |    |
| PipChl_A | 1976528 | G->A |             |      |                                                                                          |    |
| PipChl_A | 4187340 | C->T | NP_418415.1 | rpoC | RNA polymerase; beta prime subunit                                                       | No |
| PipChl_A | 4275549 | C->T | NP_418487.1 | soxR | DNA-binding transcriptional dual regulator; Fe-S center for redox-sensing                | No |
| PipChl_B | 1976527 | G->T |             |      |                                                                                          |    |
| PipChl_B | 1976528 | G->A |             |      |                                                                                          |    |
| PipChl_B | 4184379 | G->C | NP_418415.1 | rpoC | RNA polymerase; beta prime subunit                                                       | No |
| PipChl_B | 4632867 | C->T | NP_418813.1 | rob  | right oriC-binding transcriptional activator; AraC family                                | No |
| PipChl_C | 484997  | A->G | NP_414997.1 | acrR | DNA-binding transcriptional repressor                                                    | No |
| PipChl_C | 1976527 | G->T |             |      |                                                                                          |    |
| PipChl_C | 3214645 | T->C |             |      |                                                                                          |    |
| PipChl_C | 4632867 | C->T | NP_418813.1 | rob  | right oriC-binding transcriptional activator; AraC family                                | No |
| PipTet_A | 485076  | C->A | NP_414997.1 | acrR | DNA-binding transcriptional repressor                                                    | No |



|          |         |      |             |      |                                                                         |     |
|----------|---------|------|-------------|------|-------------------------------------------------------------------------|-----|
| PipTet_A | 1906727 | G->A | NP_416340.1 | mgrB | regulatory peptide for PhoPQ; feedback inhibition                       | No  |
| PipTet_A | 1976527 | G->T |             |      |                                                                         |     |
| PipTet_A | 1976528 | G->A |             |      |                                                                         |     |
| PipTet_A | 3533586 | G->A | NP_417863.1 | envZ | sensory histidine kinase in two-component regulatory system with OmpR   | No  |
| PipTet_B | 484998  | C->T | NP_414997.1 | acrR | DNA-binding transcriptional repressor                                   | No  |
| PipTet_B | 2729754 | T->A | NP_417083.1 | clpB | protein disaggregation chaperone                                        | Yes |
| PipTet_B | 4187339 | G->A | NP_418415.1 | rpoC | RNA polymerase; beta prime subunit                                      | No  |
| PipTet_C | 484997  | A->G | NP_414997.1 | acrR | DNA-binding transcriptional repressor                                   | No  |
| PipTet_C | 1976527 | G->T |             |      |                                                                         |     |
| PipTet_C | 1976528 | G->A |             |      |                                                                         |     |
| PipTet_C | 3533368 | C->T | NP_417863.1 | envZ | sensory histidine kinase in two-component regulatory system with OmpR   | No  |
| PipTet_C | 4183090 | G->T | NP_418414.1 | rpoB | RNA polymerase; beta subunit                                            | No  |
| Tet_A    | 484987  | G->A | NP_414997.1 | acrR | DNA-binding transcriptional repressor                                   | No  |
| Tet_A    | 1617480 | C->T | NP_416047.4 | marR | DNA-binding transcriptional repressor of multiple antibiotic resistance | No  |
| Tet_A    | 3438262 | C->T | NP_417754.1 | rpoA | RNA polymerase; alpha subunit                                           | No  |
| Tet_B    | 483223  | G->T | NP_414995.1 | acrB | multidrug efflux system protein                                         | No  |
| Tet_B    | 985121  | A->C | NP_415449.1 | ompF | outer membrane porin 1a (la                                             | No  |
| Tet_C    | 985350  | G->A | NP_415449.1 | ompF | outer membrane porin 1a (la                                             | No  |

#### D. INDELS Identified in the evolved MG1655 Strain

| Strain/AB_selection | From Position | Type      | INDEL            | Genbank ID  | Gene | Product                                                                   |
|---------------------|---------------|-----------|------------------|-------------|------|---------------------------------------------------------------------------|
| Amk_B               | 753063        | insertion | C->CTACGGTTCGCAC | NP_415248.1 | gltA | citrate synthase                                                          |
| Amk_B               | 2925947       | insertion | T->TTATAT        |             |      |                                                                           |
| Amk_B               | 4081530       | deletion  | GCCATGC->G       | NP_418330.1 | fdoG | formate dehydrogenase-O; large subunit                                    |
| AmkTet_A            | 1617207       | insertion | T->TAATC         | NP_416047.4 | marR | DNA-binding transcriptional repressor of multiple antibiotic resistance   |
| AmkTet_A            | 3469704       | insertion | C->CAAC          | NP_417799.1 | fusA | protein chain elongation factor EF-G; GTP-binding                         |
| AmkTet_A            | 4468534       | deletion  | CCG->C           |             |      |                                                                           |
| AmkTet_B            | 484953        | deletion  | AT->A            |             |      |                                                                           |
| Chl_A               | 882788        | insertion | A->AGTAATAAT     |             |      |                                                                           |
| Chl_B               | 4254115       | deletion  | ACACTGG->A       | NP_418465.4 | plsB | glycerol-3-phosphate O-acyltransferase                                    |
| ChlTet_A            | 1617515       | deletion  | CA->C            | NP_416047.4 | marR | DNA-binding transcriptional repressor of multiple antibiotic resistance   |
| Cip_A               | 4275869       | deletion  | CGCG->C          | NP_418487.1 | soxR | DNA-binding transcriptional dual regulator; Fe-S center for redox-sensing |
| Cip_C               | 987835        | insertion | G->GGCG          | NP_415450.1 | asnS | asparaginyl tRNA synthetase                                               |

|          |         |           |                              |             |      |                                                                                                        |
|----------|---------|-----------|------------------------------|-------------|------|--------------------------------------------------------------------------------------------------------|
| Cip_C    | 1142060 | insertion | A->ACCATCGC                  | NP_415602.1 | rne  | fused ribonucleaseE:<br>endoribonuclease/RNA-<br>binding protein/RNA<br>degradosome binding<br>protein |
| Cip_C    | 3445977 | deletion  | TGG->T                       | NP_417769.1 | rplN | 50S ribosomal subunit<br>protein L14                                                                   |
| Cip_C    | 4275871 | deletion  | CGCA->C                      | NP_418487.1 | soxR | DNA-binding<br>transcriptional dual<br>regulator; Fe-S center for<br>redox-sensing                     |
| CipAmk_A | 485481  | deletion  | AT->A                        | NP_414997.1 | acrR | DNA-binding<br>transcriptional repressor                                                               |
| CipAmk_A | 2337194 | deletion  | CCGA->C                      | NP_416734.1 | gyrA | DNA gyrase (type II<br>topoisomerase); subunit A                                                       |
| CipAmk_B | 2337194 | deletion  | CCGA->C                      | NP_416734.1 | gyrA | DNA gyrase (type II<br>topoisomerase); subunit A                                                       |
| CipChl_A | 458212  | deletion  | GA->G                        | NP_414973.1 | lon  | DNA-binding ATP-<br>dependent protease La                                                              |
| CipChl_A | 2337194 | deletion  | CCGA->C                      | NP_416734.1 | gyrA | DNA gyrase (type II<br>topoisomerase); subunit A                                                       |
| CipChl_B | 485598  | insertion | C->CGCC                      | NP_414997.1 | acrR | DNA-binding<br>transcriptional repressor                                                               |
| CipChl_B | 986403  | deletion  | TAAC->T                      |             |      |                                                                                                        |
| CipChl_C | 2337194 | deletion  | CCGA->C                      | NP_416734.1 | gyrA | DNA gyrase (type II<br>topoisomerase); subunit A                                                       |
| CipChl_C | 4275869 | deletion  | CGCG->C                      | NP_418487.1 | soxR | DNA-binding<br>transcriptional dual<br>regulator; Fe-S center for<br>redox-sensing                     |
| CipPip_B | 485036  | insertion | T->TG                        | NP_414997.1 | acrR | DNA-binding<br>transcriptional repressor                                                               |
| CipPip_B | 2337194 | deletion  | CCGA->C                      | NP_416734.1 | gyrA | DNA gyrase (type II<br>topoisomerase); subunit A                                                       |
| CipPip_C | 485136  | deletion  | CA->C                        | NP_414997.1 | acrR | DNA-binding<br>transcriptional repressor                                                               |
| CipPip_C | 4275889 | insertion | A->AGTA                      | NP_418487.1 | soxR | DNA-binding<br>transcriptional dual<br>regulator; Fe-S center for<br>redox-sensing                     |
| CipTet_A | 986138  | deletion  | TGCAG->T                     | NP_415449.1 | ompF | outer membrane porin 1a<br>(1a                                                                         |
| CipTet_A | 4184028 | insertion | C->CAGC                      | NP_418415.1 | rpoC | RNA polymerase; beta<br>prime subunit                                                                  |
| CipTet_A | 4275869 | deletion  | CGCG->C                      | NP_418487.1 | soxR | DNA-binding<br>transcriptional dual<br>regulator; Fe-S center for<br>redox-sensing                     |
| CipTet_B | 2105    | deletion  | CATCA->C                     | NP_414543.1 | thrA | fused aspartokinase I and<br>homoserine<br>dehydrogenase I                                             |
| CipTet_B | 484937  | deletion  | AT->A                        |             |      |                                                                                                        |
| CipTet_C | 4632753 | deletion  | TTGC->T                      | NP_418813.1 | rob  | right oriC-binding<br>transcriptional activator;<br>AraC family                                        |
| Pip_A    | 1617115 | deletion  | TGCAACTAATTACTTGCCAGG-<br>>T |             |      |                                                                                                        |

|          |         |           |                   |             |      |                                                                         |
|----------|---------|-----------|-------------------|-------------|------|-------------------------------------------------------------------------|
| Pip_B    | 1712342 | deletion  | CT->C             |             |      |                                                                         |
| PipAmk_B | 4102928 | insertion | C->CACCAACATCAAC  | NP_418347.1 | cpxA | sensory histidine kinase in two-component regulatory system with CpxR   |
| PipTet_B | 1617324 | insertion | A->AA             | NP_416047.4 | marR | DNA-binding transcriptional repressor of multiple antibiotic resistance |
| PipTet_B | 3533825 | deletion  | GCAAGGTGACGAT->G  | NP_417863.1 | envZ | sensory histidine kinase in two-component regulatory system with OmpR   |
| PipTet_C | 1617318 | deletion  | TG->T             | NP_416047.4 | marR | DNA-binding transcriptional repressor of multiple antibiotic resistance |
| Tet_B    | 1617384 | insertion | A->AAAAGGCTGGGTGG | NP_416047.4 | marR | DNA-binding transcriptional repressor of multiple antibiotic resistance |
| Tet_C    | 1617384 | insertion | A->AAAAGGCTGGGTGG | NP_416047.4 | marR | DNA-binding transcriptional repressor of multiple antibiotic resistance |

**Table S3.** Individual SNPs and INDELS.

A) SNPs that were identified in the WT non-evolved strain of MG1655 when compared to the deposited Genbank sequence of MG1655 (NC\_000913). Annotations were obtained from the deposited Genbank record.

B) INDELS that were identified in the WT non-evolved strain of MG1655 when compared to the deposited Genbank sequence of MG1655 (NC\_000913). Annotations were also obtained from the deposited Genbank record.

C) SNPs that were identified in the evolved lineages based on comparison to the deposited Genbank sequence of MG1655 (NC\_000913) with SNPs found in the non-evolved strain masked (A). Annotations were also obtained from the deposited Genbank record.

D) INDELS that were identified in the evolved lineages based on comparison to the deposited Genbank sequence of MG1655 with INDELS found in the non-evolved strain masked (B). Annotations were also obtained from the deposited Genbank record.

A)

|                         | MAGE-Oligo                                                                                 |
|-------------------------|--------------------------------------------------------------------------------------------|
| <i>cpxA</i> _G4102763A- | TTAATGTGGTGGCGGCGTCTGTTCCGGGCGATTGATAAGTGGGTACCGCCAGGACAGCGTTTGTATTGGTGACCACCGAAGGCCGCGTG  |
| <i>fusA</i> _G3469714A+ | GAGTTTCTACTTCAACCTTCATGATCGGCTCAAGCAGAAGCTGGTTTCACTTTCTTAAAGCCTTCTTAAAGGCGATAGAAGCAGCCAGTT |
| <i>sbmA</i> _C396368A-  | ATATGACGCAGTTGTTGCCAGTTCCCATGTAATATTGTTTCATCTCTGTACGCCAGCGGAACACGTAGTGACTGACAAAGAAGTTGTTT  |
| <i>gyrA</i> _T2337183C+ | ACCGAAGTTACCCTGACCGTCTACCAGCATATAACGCAGCGAGAATGGCTGCGCCATGCGGACGATCGTGCCATAGACCGCCGAGTCACC |
| <i>marR</i> _C1617480T+ | GTAAAACCTACCACCGGCGGCGGCAATATGTGAACAATGCCATTAATTAGTTGGCCAGGACCTGCACCAAGAATTAACAAAAAACCTG   |

B)

| qPCR        | WT forward primer      | Mutant forward primer  | Reverse primer        |
|-------------|------------------------|------------------------|-----------------------|
| <i>cpxA</i> | ACGCTGTCCTGGCGGTG      | ACGCTGTCCTGGCGGTA      | CACGCCAGATGACCGAGC    |
| <i>fusA</i> | GCTCAAGCAGAAGCTGGTTTCG | GCTCAAGCAGAAGCTGGTTTCA | TAATCCCTGGCGAATACATCC |
| <i>sbmA</i> | GTTCCGCTGGCGTACAGC     | GTTCCGCTGGCGTACAGA     | GCGGAGAGCGTTACCAGC    |
| <i>gyrA</i> | CCATGCGGACGATCGTGT     | CCATGCGGACGATCGTGC     | GCGATGTCGGTCATTGTTGG  |
| <i>marR</i> | GCAATATGTGAACAATGCCATC | GCAATATGTGAACAATGCCATT | TGGCGATTCCAGGTTGTCC   |

**Table S4.** Oligos for MAGE and qPCR primers.

A) MAGE oligos: The MAGE oligos were designed according to (76). The oligo name reflects the SNP change at the position number according to MG1655 (Accession no. NC\_000913). The + and - denote whether the oligo is targeting the plus or the minus strand.

B) qPCR primers: Forward qPCR primers are identical except for the 3' nucleotide being altered according to the introduced SNP. The reverse primer is common for both forward primers.
